# Supplementary material
Source: PubMed Central journal article supplement (PMC7578919)
Supplement: jamasurg-e204569-s001.pdf [file jamasurg-e204569-s001.pdf]

1 **Registry-Based, Prospective, Single-Blind, Randomized Controlled Trial:**

2 **Robotic vs. Laparoscopic Ventral Hernia Repair with Intraperitoneal Onlay Mesh (IPOM)**

3 **PI: Ajita Prabhu, MD FACS**

4

5

6

7 **INTRODUCTION**

8           Despite the adoption of the robotic platform for ventral hernia repair, there is still a  
9 paucity of literature to speak to the benefits of this approach. Potential benefits are currently  
10 being investigated. A report prepared for the Centers for Medicare and Medicaid Services  
11 (CMS) recently defined benefit to be defined in terms of improved service quality and increased  
12 financial performance (1). Service quality, as measured by the Hospital Consumer Assessment  
13 of Healthcare Providers and Systems (HCAHPS) survey, encompasses pain (2). Decreased pain  
14 control has been associated with lower HCAHPS scores. The discussion concerning robotic  
15 ventral hernia repair must include a detailed analysis of surgical outcomes and cost.

16           In our recently-published propensity score analysis comparing laparoscopic and robotic  
17 ventral hernia repairs with intraperitoneal onlay mesh (IPOM) (3), we showed a 1-day decrease  
18 in hospital length of stay (LOS) with the robotic versus laparoscopic platform for laparoscopic  
19 ventral hernia repair with IPOM. The reasons for this decrease in stay remain unknown.

20           While multiple papers have described postoperative pain following laparoscopic ventral  
21 hernia repair (4-10), scant data exists evaluating postoperative pain following robotic ventral  
22 hernia repair (11). The few published papers currently available suggest that patients experience  
23 decreased pain following robotic repair. Tayar et al. assessed 11 patients and found that their  
24 average pain rating on postoperative day 1 following robotic ventral hernia repair was 3 (on a  
25 scale of 0 to 10) (11). In contrast, previous publications have suggested that patients have a  
26 score of 5-6 following laparoscopic ventral hernia repair (4, 5, 6, 7, 8, 9, 10). Waite et al. have  
27 also compared robotic and laparoscopic inguinal transabdominal preperitoneal (TAPP) repair and

28 detected postoperative day 1 pain scores of 2.5 versus 3.8 (12). These findings in sum, albeit  
29 from heterogeneous studies, suggest that patients experience decreased pain levels following  
30 robotic, versus laparoscopic, hernia repair.

31 Literature on cost analysis of robotic ventral hernia repair also remains sparse (13).  
32 Previous authors have posited that the robot is more expensive for other high-volume minimally  
33 invasive procedures, including TAPP inguinal hernia repair (12, 14). Mehaffey et al. performed  
34 a financial analysis showing higher median hospital costs of \$1124 per case for robotic ventral  
35 hernia repair and higher associated fixed costs versus that of laparoscopic cases (15). These  
36 figures largely resulted from increased operative time for robotic procedures. Their analysis did  
37 not include a consideration of other variable costs of the surgery. In addition, no high-quality  
38 literature exists concerning long-term recurrence rates following robotic ventral hernia repair (3).

39 Our hypotheses are multiple: 1) Patients with ventral hernias undergoing robotic IPOM  
40 will experience a 30% decrease in pain scores by postoperative day 1 compared to patients  
41 undergoing laparoscopic IPOM; 2) Robotic IPOM will be associated with higher median direct  
42 costs per case versus laparoscopic IPOM, and 3) Robotic IPOM will be associated with  
43 equivalent 1-year hernia recurrence rates versus laparoscopic IPOM.

44 To help determine if the robotic platform has an impact on postoperative pain, cost and  
45 hernia recurrence, we propose a registry-based, randomized clinical trial (RCT) through the  
46 Americas Hernia Society Quality Collaborative (AHSQC). The AHSQC is a multicenter,  
47 nationwide quality improvement effort with a mission to improve value in hernia care. Data are  
48 collected prospectively in the routine care of hernia patients for quality improvement purposes.  
49 The information collected in the AHSQC offers a natural repository of information that can be  
50 used for research, in addition to its quality improvement purpose.

51 **STUDY DESIGN**

52 This will be a prospective, registry-based, single-blind, randomized controlled trial with a  
53 1:1 allocation ratio. No important changes to the methods are anticipated. This will be a single-  
54 institutional study performed at the Cleveland Clinic Foundation in Cleveland, Ohio from 2017  
55 to 2019, and the AHSQC will serve as our platform. All enrollments and surgeries in this study  
56 will take place at the Cleveland Clinic Comprehensive Hernia Center. Specific inclusion criteria  
57 are all patients of at least 18 years of age, primary ventral or incisional hernia defects, with an  
58 expected hernia width equal or less than 7 centimeters, presenting for an elective ventral hernia  
59 repair and who are considered eligible to undergo the operation through a minimally invasive  
60 approach (either laparoscopic or robotic). Patients should be able to give consent form and  
61 tolerate general anesthesia to take part in this study. Exclusion criteria will be defects greater  
62 than 7 centimeters, hernia defects requiring an open approach, and patients who are not able to  
63 understand and sign a written consent form.

64 The study will consist of 2 interventions: laparoscopic IPOM or robotic IPOM. The  
65 surgical technique is further described in the following section entitled “Surgical Technique”.

66 A computer-generated randomization scheme will be built by a CCF statistician (who is  
67 listed in this protocol). Randomization will take place on the Research Electronic Data Capture  
68 (REDCap®) database program. Patients will be randomized to laparoscopic IPOM or robotic  
69 IPOM at the moment of enrollment, during preoperative evaluation.

70 Primary outcome measure is early postoperative pain. Secondary outcome measures are  
71 cost and hernia recurrence. We will also collect outcomes pertaining to abdominal wall-specific  
72 quality of life, and 30-day wound events. No changes to trial outcomes are anticipated, and no

73 interim analyses will be performed. No stopping guidelines are needed, as both the laparoscopic  
74 and robotic platforms represent current standards of care for ventral hernia repair, and both  
75 approaches are currently offered at Cleveland Clinic Comprehensive Hernia Center.

76         Subjects will be blinded to the intervention. An equal number of identical bandages will  
77 be applied to the abdomen in similar locations following each intervention. We are unable to  
78 blind the operating surgeon to the intervention arm. We are unable to blind the data collector,  
79 the research fellow, to the patients within each intervention arm. However, by utilizing data  
80 largely determined from the patients themselves, who will not be informed of the operation that  
81 they have received until after study completion, we believe that we are presenting an accurate  
82 data with limited bias. No subgroup analyses will be performed. Patients will be excluded from  
83 analysis if they are lost to follow-up.

#### 84 **OUTCOMES TO BE INVESTIGATED**

85         Outcomes to be investigated are based on the aforementioned study hypotheses and are  
86 listed below:

87         *Specific Aim #1: To determine if patients with ventral hernias undergoing robotic IPOM*  
88 *experience a 30% decrease in pain scores by postoperative day 1 compared to patients*  
89 *undergoing laparoscopic IPOM.*

90         The primary outcome is early postoperative pain. Pain will be assessed by Patient-  
91 Reported Outcome Measurement Information System (PROMIS) Pain Intensity 3a survey and  
92 the Numeric Pain Rating Scale (NRS-11). The PROMIS pain intensity 3a survey is a National  
93 Institutes of Health developed a validated tool that focuses on patient-reported outcomes of pain  
94 characteristics (17). The NRS-11 is a frequently utilized pain assessment that consists of an

95 easily administered 0 to 10 Likert scale, in which higher scores reflect greater pain intensity(16).  
96 PROMIS Pain Intensity 3a survey pain scores will be assessed at baseline (at the time of  
97 enrollment), at 30 ( $\pm$  15) and 365 ( $\pm$  90) days. NRS-11 scores, often used to measure acute pain,  
98 will be obtained in the post-anesthesia care unit, and on postoperative days 1 ( $\pm$  1 days), 7 ( $\pm$  3  
99 days) and 30( $\pm$ 15 days). The NRS-11 scores will be obtained either in person while the patients  
100 are hospitalized, or by telephone interviews following their hospital discharge. Postoperative  
101 narcotic requirements, converted into morphine equivalents, will also be obtained for the first 24  
102 hours postoperatively through review of the patient medical records.

103 *Specific Aim #2: To determine if robotic IPOM is associated with higher direct costs*  
104 *versus laparoscopic IPOM.*

105 A secondary outcome is direct cost at the index admission surgery and at 30 days and 365  
106 days after surgery. Cost data will be obtained from the Cleveland Clinic financial department  
107 and will include direct costs. Direct costs for the index operation will include operating room  
108 supply and time, intensive care unit, anesthesia, floor care, laboratory tests, radiology and  
109 endoscopy, pharmacy, and in-hospital rehabilitation therapies. The operating room supply direct  
110 costs for index surgeries will be further categorized into the following groups: mesh and general  
111 supply costs. Indirect costs and total charges will be excluded. This analysis is in keeping with  
112 that previously performed by one of our principal investigators (18). Capital costs, including the  
113 robotic system, laparoscopic towers, and non-disposable equipment, will not be included.

114

115

116            *Specific Aim #3: To determine if robotic IPOM is associated with equivalent one-year*  
117 *recurrence rates versus laparoscopic IPOM.*

118            Hernia recurrence will be assessed with the Ventral Hernia Recurrence Inventory survey  
119 (VHRI) at 365 ( $\pm$  90) days. The VHRI, which uses patient-reported outcomes to detect hernia  
120 recurrence, is a validated tool that has been shown to detect ventral hernia recurrence with a  
121 sensitivity of 85% and a specificity of 81%.(19)

122            Additional outcomes include abdominal wall-specific quality of life and 30-day wound  
123 events. Abdominal wall-specific quality of life will be determined by the HerQLes  
124 questionnaire. HerQLes is a 12-question hernia-specific survey that has been previously  
125 validated in patients undergoing ventral hernia repair (20). This will be assessed at baseline, at  
126 30 days ( $\pm$  15 days) and at 365 days ( $\pm$  90 days). Wound events are defined as surgical site  
127 infection (SSI), surgical site occurrence (SSO) and surgical site occurrences requiring procedural  
128 intervention (SSOPI), as defined by the Ventral Hernia Working Group (21,22). Wound events  
129 will be assessed by a physical exam at 30( $\pm$  15) days and 365 ( $\pm$  90) days. This information is  
130 already routinely collected for all patients included in the AHSQC.

### 131 **SURGICAL PROCEDURE**

132            In both groups, patients will be positioned in supine position, with both arms tucked. All  
133 operations will be performed under general anesthesia. Antibiotic prophylaxis, prophylaxis of  
134 venous thromboembolic events, skin preparation and hair removal, will be performed per  
135 Surgical Care Improvement Project protocol.

136            Our surgical approach to laparoscopic IPOM is as follows: Initial access is performed in  
137 the left upper quadrant, at Palmer's point. Optical access into the peritoneal cavity is achieved

138 using a 5mm optical trocar. Insufflation of CO<sub>2</sub> is performed with a pressure of 15mmHg, under  
139 direct laparoscopic visualization. Two additional trocars are placed on the left side, along the  
140 anterior axillary line (usually one 12mm trocar and another 5mm trocar). If deemed necessary  
141 by the attending surgeon, an auxiliary 5mm port is placed on the right side. When present,  
142 hernia contents are reduced using gentle traction with atraumatic graspers. Adhesions between  
143 intra-abdominal contents and the anterior abdominal wall are lysed using cold, sharp dissection.  
144 The hernia defect is identified and measured internally with a sterile plastic ruler with the  
145 abdomen insufflated. Defect closure is performed with transfascial sutures of number 1,  
146 monofilament, nonabsorbable suture. This is accomplished with the aid of a Carter-Thomason  
147 suture passer. Mesh repair is performed using a standard piece of polypropylene mesh with an  
148 absorbable hydrogel barrier. A number 0 absorbable suture will be placed in the center of the  
149 mesh. The size of the mesh will be defined by the attending surgeon to achieve a minimum 3 to  
150 5-centimeter overlap from the edges of the closed defect. Mesh is rolled and introduced into the  
151 cavity through a 12mm port. Inside the abdomen, the mesh is unrolled and adequate positioning  
152 is confirmed. Using the Carter-Thomason suture passer, the previously placed absorbable sutures  
153 in the mesh are pulled outside the cavity and tied, positioning mesh against the anterior  
154 abdominal wall. Using the double crown technique, mesh edges are fixed circumferentially to  
155 the anterior abdominal wall with permanent tacks. Four additional monofilament, nonabsorbable  
156 sutures are placed in the cardinal points of the mesh using the Carter-Thomason suture passer.  
157 The entire cavity is assessed, and adequate hemostasis is confirmed. Ports will be removed  
158 under direct visualization, and the abdomen will be desufflated. The anterior fascia of the 12mm  
159 port is closed with absorbable sutures. Skin and subcutaneous tissue are closed with absorbable  
160 sutures. Surgical skin glue will be applied.



161           Our surgical approach to robotic-assisted IPOM is as follows: The da Vinci® Surgical  
162 System robotic platform (Intuitive Surgical, Inc.) will be used. Initial access is performed in the  
163 left upper quadrant, at Palmer’s point. Optical access into the peritoneal cavity is achieved using  
164 a 5mm optical trocar. Insufflation of CO<sub>2</sub> is performed with a pressure of 15mmHg, under direct  
165 laparoscope visualization. A 12mm and an 8mm robotic port are placed on the left side along the  
166 anterior axillary line. A 12 mm assistant port is placed on the right side of the abdomen under  
167 direct laparoscopic visualization. The left upper quadrant access port is upsized to a 8 mm  
168 robotic port. The robot is docked. When present, hernia contents are reduced using gentle  
169 traction with atraumatic graspers. Adhesions between intra-abdominal contents and the anterior  
170 abdominal wall are lysed using cold, sharp dissection. The hernia defect is identified and  
171 measured internally with a sterile plastic ruler with the abdomen insufflated. Defect closure is  
172 performed intracorporeally with 3-0 absorbable barbed suture. Mesh repair is performed using a  
173 standard piece of polypropylene mesh with an absorbable hydrogel barrier. A number 0  
174 absorbable suture will be placed in the center of the mesh. The size of the mesh will be defined  
175 by the attending surgeon to achieve a minimum 3-5-centimeter overlap. Mesh is rolled and  
176 introduced into the cavity through a 12mm port. Inside the abdomen, the mesh is unrolled and  
177 adequate positioning is confirmed. Using the Carter-Thomason suture passer, the previously-  
178 placed absorbable sutures in the mesh are pulled outside the cavity and tied, positioning the mesh  
179 against the anterior abdominal wall. Mesh edges are fixed circumferentially using running, 3-0  
180 absorbable barbed suture. The entire cavity is reviewed, and adequate hemostasis is confirmed.  
181 Ports will be removed under direct visualization, and the abdomen desufflated. Anterior fascia  
182 of the 12mm and 8mm ports are closed with absorbable sutures. Skin and subcutaneous tissue  
183 are closed with absorbable sutures. Surgical skin glue is applied.

184 **ANTICIPATED TIME FRAME**

185 Estimated patient accrual time is two years with data collection to occur over one  
186 year from the last enrolled patient. Data analysis and manuscript production will occur within six  
187 months of completion of data collection.

188 **PATIENT RISKS AND DISCOMFORTS**

189 As with any surgical procedure, patients may experience pain, bleeding, and discomfort.  
190 Possible morbidities following hernia repair by either the laparoscopic or robotic platform  
191 include seroma, hematoma, inflammation, wound dehiscence, and infection. As both platforms  
192 represent current standards of care, patients in neither intervention are expected to incur unusual  
193 risk of harm.

194 **PATIENT BENEFITS**

195 There are no direct benefits to subjects for participation in this study. Subject  
196 participation will, however, help physicians and hospital administrators better understand the  
197 pain outcomes and costs associated with the robotic versus laparoscopic platforms for ventral  
198 hernia repair.

199 **COSTS TO THE SUBJECTS**

200 There are no extra costs to the subjects associated with this research endeavor other than  
201 the minimal amount of time (less than 1 minute) required to answer the NRS-11 surveys at 1 and  
202 7 days postoperative. The remaining surveys and physical exams will be performed at routine  
203 postoperative visits. If the patient is contacted by phone for routine follow up and the  
204 questionnaires are answered, data including physical exam and CT results from any subsequent  
205 office visits in the defined study window, will be collected for analysis.

206 Procedures related to preoperative evaluation, hernia repair, and postoperative monitoring are  
207 considered standard of care and will be billed to the subject or the subject's insurance company.

208 **ALTERNATIVES TO PARTICIPATION**

209 Patients are under no obligation to participate in this study. The principal investigator  
210 will discuss all available surgical options with patients. It will be emphasized that refusal to  
211 participate in this study will not impact any patient's ability to receive care or to undergo ventral  
212 hernia repair at the Cleveland Clinic Foundation.

213

214 **PAYMENTS TO SUBJECTS**

215 There will be no direct payments or financial benefit to the subjects. Participation will be  
216 voluntary.

217 **PLAN FOR OBTAINING INFORMED CONSENT**

218 For each subject, written informed consent will be obtained prior to any protocol-related  
219 activities. As part of the informed consent procedure, the principal investigator, surgeon co-  
220 investigator, or one of the approved study coordinators will explain verbally and in writing the  
221 nature, duration, and purpose of the study in such a manner that the subject is aware of potential  
222 risks, inconveniences, or adverse effects that may occur. Subjects will be informed that they  
223 may withdraw from the study at any time and will receive all information required by federal  
224 regulations.

225 Following identification of a potential study participant, the investigator or co-  
226 investigator will be responsible for instituting the informed consent process in a face-to-face

227 manner. Before starting any study procedures, the investigator will discuss the proposed  
228 research study in detail with the potential subject during the office visit to discuss treatment  
229 options. The subject will be allowed ample time to read and review the informed consent  
230 document and to ask questions. The informed consent document will be reviewed with the  
231 subject in depth by the participating investigator or by a designated member of the research team  
232 to ensure that the potential participant has a thorough understanding of the study protocol and  
233 understands the potential risks and benefits of study participation and his or her rights as a study  
234 participant. The investigators will be available by phone or office visit to answer any questions  
235 that the participant may have. After consideration, the subject may return if necessary for  
236 another visit with the investigator and ask additional questions before signing the informed  
237 consent document to participate in this study.

238         After the subject has read and reviewed the informed consent document and has agreed to  
239 participate, he/she will be asked to sign and date the document. The study member obtaining  
240 consent will also sign and date the form, and documentation of the informed consent process will  
241 be included in the research file (i.e., the person who obtained consent, where and when consent  
242 was obtained, and who was present during the process). A copy of the consent form will be  
243 given to the subject for his/her records.

#### 244 **PROVISIONS FOR SUBJECTS FROM VULNERABLE POPULATIONS**

245         The population to be studied includes adults of at least 18 years of age. Children,  
246 cognitively-impaired persons, pregnant women, students and house staff under the direct  
247 supervision of the investigator are considered vulnerable populations and will, therefore, be  
248 excluded from participation. If a Cleveland Clinic Foundation staff member or employee is a  
249 potential candidate for the study, the subject will be informed during the consent process that

250 his/her participation or refusal to participate will not influence grades, employment, or  
251 subsequent recommendations.

252 If a subject cannot read a consent form due to illiteracy or blindness, a member of the  
253 research study staff will read and explain the consent form to the participant or to the  
254 participant's legally-authorized representative. A witness who will sign and date the consent  
255 form must be present during this encounter.

## 256 **SUBJECT PRIVACY AND DATA CONFIDENTIALITY**

257 Subject anonymity and data confidentiality will be maintained throughout this study.  
258 Every effort will be made to maintain the confidentiality of documents that identify the subject  
259 by name (e.g., signed informed consent documents, clinic charts), except to the extent necessary  
260 to allow monitoring by the Office of Research Compliance at the Cleveland Clinic or by other  
261 regulatory authorities.

262 All of the information collected, such as name or medical record number, will be stored  
263 in the Americas Hernia Society Quality Collaborative (AHSQC) and on REDCap®. The  
264 AHSQC is a secure database that is used nationally to track clinical outcomes in patients who  
265 undergo hernia repair. Randomization will occur with the use of a customized REDCap®  
266 database program, a secure network/firewall-protected electronic database for which only the  
267 investigator and the designated members of the study team will have access using an  
268 individually-assigned login and password. Only approved study members listed on the IRB  
269 protocol will have access to the separately-stored master list. Only the Principal Investigator,  
270 Lead Research Coordinators, and Biostatisticians will be granted access to retrieve patient data  
271 for data quality assessment and data analysis. All electronic records pertaining to the clinical

272 study will be password-protected and only approved study members listed on the IRB protocol  
273 will have password access.

274 **SAMPLE SIZE / POWER CALCULATION**

275                   Power calculation was performed with G\*Power 3 software for Windows (Faul,  
276 Erdfelder, Lang, & Buchner, 2007). The sample size was determined by the primary outcome of  
277 interest, the change in NRS-11 pain score at postoperative day 1. We hypothesize that the robotic  
278 approach will be associated with a 30% decrease in NRS-11 pain score at postoperative day 1.  
279 The 30% reduction used for power calculations was determined from clinical judgment, as little  
280 literature exists evaluating the minimal clinically important difference of the NRS-11 scale for  
281 ventral hernia repair. Mean NRS-11 pain score (4.76) and standard deviation (1.975) with the  
282 laparoscopic approach (control group) was determined from previously published manuscripts  
283 [7]. Assuming an alpha of 0.05, a beta of 0.20, we will need a total sample size of 62 patients  
284 (31 per arm). Considering and a 20% drop-out rate to occur in each arm, we will need  
285 approximately 74 patients (37 patients per arm). This sample size and power calculation were  
286 reviewed by the DDSI statistician listed in this protocol.

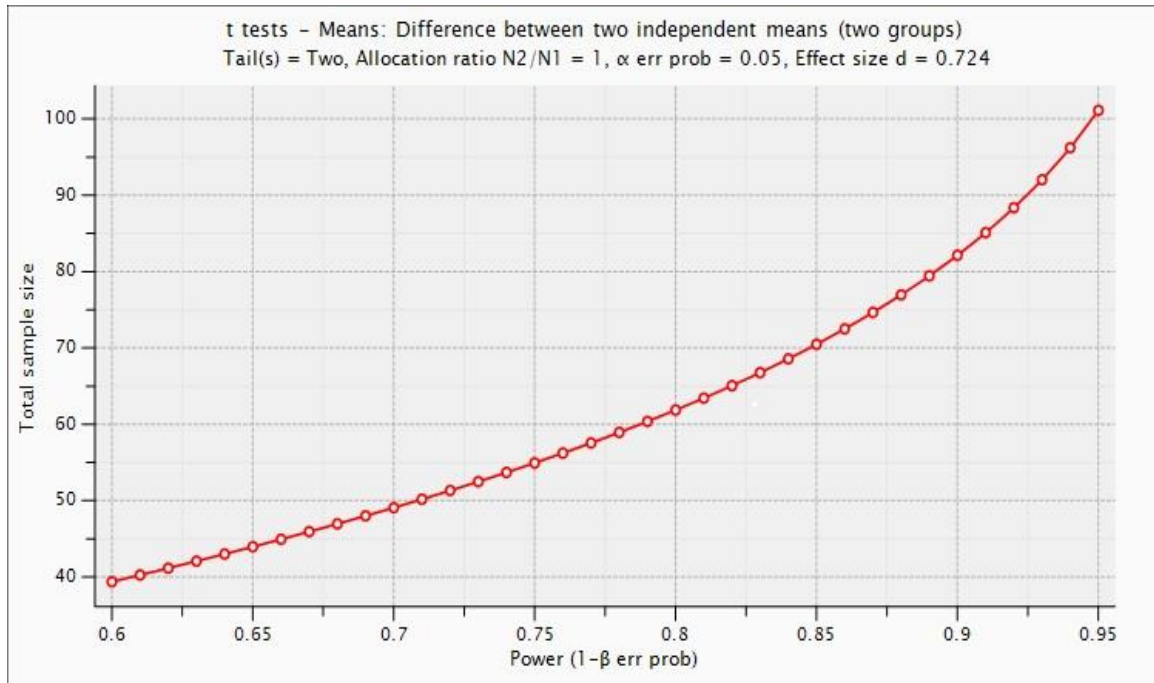

287

## 288 **STATISTICAL ANALYSIS**

289 Descriptive statistics, including means, standard deviations, and/or percentages, will be  
 290 calculated for demographic and baseline variables. Categorical variables will be reported using  
 291 proportions. Continuous variables will be reported using either means and standard deviations  
 292 for normally distributed data or median and interquartile range for non-parametric data.

293 *Specific Aim #1:* Pain scores will be compared between intervention arms at each time  
 294 point using either a Student's *t*-test (normal distribution) or a Kruskal-Wallis test (nonparametric  
 295 distribution). Differences in PROMIS scores between baseline, 30 and 365 days, respectively,  
 296 will be assessed via Wilcoxon signed-rank test.

297 *Specific Aim #2:* A univariate analysis of cost will be conducted in which costs will be  
 298 logarithmically transformed to offset the effects of outliers and then analyzed with a Student's *t*-  
 299 test.

300           *Specific Aim #3:* Recurrence rates will be compared between intervention arms via  
301 Pearson’s chi-square.

302           *Additional outcomes:* Abdominal wall-specific quality of life scores will be compared  
303 between intervention arms via Kruskal-Wallis test. Wound events will be compared between  
304 intervention arms via Pearson’s chi-square.

305           R software will be used for all analyses. A two-tailed  $p$ -value  $<0.05$  will be considered  
306 statistically significant.

307

308

309    **DATA SAFETY MONITORING BOARD**

310           A data safety monitoring board comprised of surgeons and statisticians from the  
311 Cleveland Clinic Foundation will oversee the progress of this trial. This will be a group of 2  
312 DDSI surgeons and 1 statistician. This group of individuals will meet at regular intervals to  
313 monitor the safety and progress of this trial.

314    **CLINICAL SIGNIFICANCE/INNOVATION**

315           Scant data exist evaluating pain following and cost associated with robotic ventral hernia,  
316 in addition to long-term (1 year) outcomes following robotic repair. Our study is among the first  
317 high-quality initiatives to investigate these aspects of a new surgical platform whose merits are  
318 constantly debated. Our findings will contribute to hospital administrators’ decisions on whether  
319 to purchase expensive robotic equipment and subsequently, surgeons’ initiative in further  
320 developing their operative skills on this platform.



321 **REFERENCES**

- 322 1) [https://www.cms.gov/Medicare/Quality-Initiatives-Patient-Assessment-](https://www.cms.gov/Medicare/Quality-Initiatives-Patient-Assessment-Instruments/HospitalQualityInits/downloads/HCAHPSCostsBenefits200512.pdf)  
323 [Instruments/HospitalQualityInits/downloads/HCAHPSCostsBenefits200512.pdf](https://www.cms.gov/Medicare/Quality-Initiatives-Patient-Assessment-Instruments/HospitalQualityInits/downloads/HCAHPSCostsBenefits200512.pdf)
- 324 2) Thiels CA, Hanson KT, Yost KJ, et al. Achieving a 5-star rating: Analysis of Hospital  
325 Consumer Assessment of Healthcare Providers and Systems (HCAHPS) scores among  
326 patients undergoing elective colorectal operations. *Surgery* 2016 Oct;160(4):902-14.
- 327 3) Prabhu AS, Dickens EO, Copper CM, et al. Laparoscopic vs robotic intraperitoneal mesh  
328 repair for incisional hernia: An Americas Hernia Society Quality Collaborative Analysis.  
329 *J Am Coll Surg* 2017 Apr 24.
- 330 4) Eker HH, Hansson BM, Buunen M, et al. Laparoscopic vs. open incisional hernia repair:  
331 A randomized clinical trial. *JAMA Surg* 2013 Mar;148(3):259-263.
- 332 5) Rosen MJ, Duperier T, Marks J, et al. Prospective randomized double-blind placebo-  
333 controlled trial of postoperative elastomeric pain pump devices used after laparoscopic  
334 ventral hernia repair. *Surg Endosc* 2009 Dec;23(12):2637-2645.
- 335 6) Rogmark P, Petersson U, Bringman S, et al. Short-term outcomes for open and  
336 laparoscopic midline incisional hernia repair: A randomized multicenter controlled trial:  
337 The ProLOVE (prospective randomized trial on open versus laparoscopic operation of  
338 ventral eventrations) trial. *Ann Surg* 2013 Jul;258(1):37-45.
- 339 7) Asencio F, Aguilo J, Peiro S, et al. Open randomized clinical trial of laparoscopic versus  
340 open incisional hernia repair. *Surg Endosc* 2009 Jul;23(7):1441-8.
- 341 8) Barbaros U, Asoglu O, Seven R, et al. The comparison of laparoscopic and open ventral  
342 hernia repairs: A prospective randomized study. *Hernia* 2007 Feb;11(1):51-6.

- 343 9) Misra MC, Bansal VK, Kulkarni MP, et al. Comparison of laparoscopic and open repair  
344 of incisional and primary ventral hernia: Results of a prospective randomized study. Surg  
345 Endosc 2006;20(12):1839-45.
- 346 10) Pring CM, Tran V O'Rourke N, et al. Laproscopic versus open ventral hernia repair: A  
347 randomized controlled trial. Australian N Z J Surg 2008;78(10):903-6.
- 348 11) Tayar C, Karoui M, Cherqui D, et al. Robot-assisted laparoscopic mesh repair of  
349 incisional hernias with exclusive intracorporeal suturing: A pilot study. Surg Endosc  
350 2007 Oct;21(10):1786-9.
- 351 12) Waite KE, Herman MA, Doyle PJ, et al. Comparison of robotic versus laparoscopic  
352 transabdominal preperitoneal (TAPP) inguinal hernia repair. J Robot Surg 2016  
353 Sep;10(3):239-244.
- 354 13) Stoikes N, Webb D, Voeller G. Robotic hernia repair. Surg Technol Int 2016 Oct  
355 26;XXIX:119-122.
- 356 14) Schwaitzerg SD. Financial modeling of current surgical robotic system in outpatient  
357 laparoscopic cholecystectomy: How should we think about the expense? Surg Endosc  
358 2016 May;30(5):2082-2085.
- 359 15) Mehaffey JH, Michael AD, Mullen MG, et al. Adoption of robotics in a general surgery  
360 residency program: At what cost? J Surg Res 2017 Jun 1;213:269-273.
- 361 16) Beilin Y, Hossain S, Bodian CA. The numeric rating scale and labor epidural analgesia.  
362 Anesth Analg 2003 Jun;96(6):1794-8.
- 363 17) Broderick JE, Schneider S, Junghaenel DU, et al. Validity and reliability of patient-  
364 reported outcomes measurement information system instruments in osteoarthritis.  
365 Arthritis Care Res (Hoboken) 2013 Oct;65(10):1625-33.

- 366 18) Harth KC, Rose J, Delaney CP, et al. Open versus endoscopic component separation: A  
367 cost comparison. *Surg Endosc* 2011 Sep;25(9):2865-70.
- 368 19) Baucom RB, Ousley J, Feurer ID, et al. Patient reported outcomes after incisional hernia  
369 repair-Establishing the ventral hernia recurrence inventory. *Am J Surg* 2016  
370 Jul;212(1):81-8.
- 371 20) Krpata DM, Schmotzer BJ, Flocke S, et al. Design and initial implementation of  
372 HerQLes: A hernia-related quality-of-life survey to assess abdominal wall function. *J Am*  
373 *of Surg* 2012 Nov;215(5):635-42.
- 374 21) Kanters AE, Krpata DM, Blatnik JA, et al. Modified hernia grading scale to stratify  
375 surgical site occurrence after open ventral hernia repairs. *J Am Coll Surg* 2012  
376 Dec;215(6):787-93.
- 377 22) Ventral Hernia Working Group, Breunig K, Butler CE, Ferzoco S, Franz M, Hultman CS,  
378 Kilbridge JF, Rosen M, Silverman RP, Vargo D. Incisional ventral hernias: review of the  
379 literature and recommendations regarding the grading and technique of repair. *Surgery*  
380 2010 Sep;148(3):544-58.

381
