# Supplementary material
Source: PubMed Central journal article supplement (PMC7578919)
Supplement: jamasurg-e204569-s002.pdf [file jamasurg-e204569-s002.pdf]

## Data Sharing Statement

Petro. Patient-Reported Outcomes of Robotic vs Laparoscopic Ventral Hernia Repair With Intraperitoneal Mesh. *JAMA Surg*. Published October 21, 2020. doi:10.1001/jamasurg.2020.4569

### Data

**Data available:** Yes

**Data types:** Deidentified participant data, Data dictionary

**How to access data:** [PetroC@ccf.org](mailto:PetroC@ccf.org) - for data and data dictionary

**When available:** With publication

### Supporting Documents

**Document types:** Informed consent form

**How to access documents:** [Petroc@ccf.org](mailto:Petroc@ccf.org)

**When available:** With publication

### Additional Information

**Who can access the data:** Researchers who wish to perform a meta-analysis or systematic review.

**Types of analyses:** Meta-analysis or systematic review.

**Mechanisms of data availability:** With investigator support, associated IRB approval, and agreement from the AHSQC.
